# Supplementary material for: Characterization of avian influenza H9N2 viruses isolated from ostriches (Struthio camelus)
Source: PubMed Central journal article supplement (PMC5797180; doi:10.1038/s41598-018-20645-1), 2018-02-02
Supplement: 41598_2018_20645_MOESM1_ESM.pdf [file 41598_2018_20645_MOESM1_ESM.pdf]

# Characterization of avian influenza H9N2 viruses isolated from ostriches (*Struthio camelus*)

Dongdong Wang<sup>a\*</sup>, Jingjing Wang<sup>a,b\*</sup>, Yuhai Bi<sup>c</sup>, Dandan Fan<sup>a</sup>, Hong Liu<sup>a</sup>,  
Ning Luo<sup>a</sup>, Zongtong Yang<sup>a</sup>, Shouchun Wang<sup>a</sup>, Wenya Chen<sup>d</sup>, Jianlin Wang<sup>a</sup>,  
Shouzhen Xu<sup>a</sup>, Jiming Chen<sup>b</sup>, Yi Zhang<sup>b</sup>, Yanbo Yin<sup>a</sup>

<sup>a</sup>Laboratory of Preventive Veterinary Medicine, College of Animal Science and  
Veterinary Medicine, Qingdao Agricultural University, Qingdao 266019, China.

<sup>b</sup>China Animal Health and Epidemiology Center, Qingdao 266032, China.

<sup>c</sup>CAS Key Laboratory of Pathogenic Microbiology and Immunology, Institute of Microbiology, Center for Influenza Research and Early-warning (CASCIRE), Chinese Academy of Sciences, Beijing, China

<sup>d</sup>Qingdao Oland-Better Bioengineering Co., LTD., Qingdao 266101, China.

## Correspondence:

Yanbo Yin, [yanboyin2011@163.com](mailto:yanboyin2011@163.com).

Yi Zhang, [zhangyi@cahec.cn](mailto:zhangyi@cahec.cn)

**Table S1. Similarity scores for individual genes from 7 H9N2 strains from ostrich and the corresponding genes in GenBank.**

| Virus       | PB2                             | PB1                  | PA                   | HA                   | NP                       | NA                   | M                    | NS                        |
|-------------|---------------------------------|----------------------|----------------------|----------------------|--------------------------|----------------------|----------------------|---------------------------|
| O/BJ/712/13 | C/BJ/1115/13(H9N2) <sup>a</sup> | C/SD/qd0516/12(H9N2) | C/SD/qd0516/12(H9N2) | C/SD/qd0516/12(H9N2) | C/SD/qd0516/12(H9N2)     | C/SD/qd0516/12(H9N2) | C/TJ/614/12(H9N2)    | C/WX/04030201G/13/(H7N9)  |
|             | [KM609875.1] 98%                | [KM609815.1] 99%     | [KM609775.1] 99%     | [KM609575.1] 100%    | [KM609695.1] 99%         | [KM609655.1] 99%     | [KF059287] 99%       | [KR905379.1] 98%          |
| O/HB/28/13  | C/SD/wf0514/13(H9N2)            | C/SD/wf0514/13(H9N2) | C/SD/wf0514/13(H9N2) | C/SD/wf0514/13(H9N2) | C/SD/wf0514/13(H9N2)     | C/SD/wf0514/13(H9N2) | C/SD/wf0514/13(H9N2) | C/SZ/040207GH05/13/(H7N9) |
|             | [KM609847.1] 98%                | [KM609807.1] 99%     | [KM609767.1] 100%    | [KM609567.1] 99%     | [KM609687.1] 99%         | [KM609647.1] 99%     | [KM609607.1] 99%     | [KR905370.1] 99%          |
| O/BJ/142/13 | C/HB/0721/13(H9N2)              | C/HB/0721/13(H9N2)   | C/HB/0721/13(H9N2)   | C/HB/0721/13(H9N2)   | C/HB/0721/13(H9N2)       | C/HB/0721/13(H9N2)   | C/HB/0721/13(H9N2)   | C/SD/qd01417/13(H9N2)     |
|             | [KM609872.1] 99%                | [KM609832.1] 99%     | [KM609792.1] 100%    | [KM609592.1] 99%     | [KM609712.1] 99%         | [KM609672.1] 99%     | [KM609632.1] 99%     | [KM609740.1] 100%         |
| O/BJ/293/13 | C/HB/0721/13(H9N2)              | C/HB/0721/13(H9N2)   | C/JS/WJ57/12(H9N2)   | C/HB/0721/13(H9N2)   | C/HB/0721/13(H9N2)       | C/HB/0721/13(H9N2)   | C/HB/0721/13(H9N2)   | C/SD/qd01417/13(H9N2)     |
|             | [KM609872.1] 99%                | [KM609832.1] 99%     | [KJ000709.1] 99%     | [KM609592.1] 99%     | [KM609712.1] 99%         | [KM609672.1] 99%     | [KM609632.1] 99%     | [KM609740.1] 99%          |
| O/HB/179/14 | C/SD/wf0514/13(H9N2)            | D/AH/SC702/13(H7N9)  | C/JS/XZ0616/12(H9N2) | C/ST/4329/14(mixed)  | D/GD/C3204/10(H9N2)      | C/SZ/515/13(H9N2)    | C/SD/yt0106/12(H9N2) | C/GD/01/11(H9N2)          |
|             | [KM609847.1] 98%                | [CY147058.1] 99%     | [KJ426375.1] 99%     | [KP418192.1] 99%     | [KM113166.1] 98%         | [KP414262.1] 99%     | [KM609603] 99%       | [KC8821273] 99%           |
| O/HB/182/14 | C/SD/qd0516/12(H9N2)            | C/YT/2468/13(H9N2)   | C/YT/2529/13(mixed)  | C/YT/2468/13(H9N2)   | C/YT/2243/13(H9N2)       | C/YT/2243/13(H9N2)   | C/BJ/0331/13(H9N2)   | C/GD/01/11(H9N2)          |
|             | [KM609855.1] 98%                | [KP414700.1] 99%     | [KP415204.1] 99%     | [KP414702.1] 99%     | [KP415180.1] 99%         | [KP4151801.1] 99%    | [609637..1] 99%      | [KC8821273] 99%           |
| O/YN/438/14 | C/RZ/2658/13(H9N2)              | G/JS/1027/13(H7N9)   | D/SN/04802G/13(H7N9) | C/SD/TA05/13(H9N2)   | H/AH/1-YK RG202/13(H7N9) | C/RZ/3052/13(H9N2)   | G/JS/1027/13(H7N9)   | C/WX/04030201G/13(H7N9)   |
|             | [KP415216.1] 99%                | [KP455976.1] 99%     | [KM879372.1] 99%     | [KP006605.1] 99%     | [CY193254.1] 99%         | [KP4144792.1] 100%   | [KP455981.1] 99%     | [KR905379.1] 99%          |

<sup>a</sup>The accession numbers and similarity scores are shown after the strain name.

**Table S2.1. Clinical data for the chicken intravenous pathogenicity test for O/BJ/293/13.**

| Clinical symptoms   | 1 d.p.i. | 2 d.p.i. | 3 d.p.i. | 4 d.p.i. | 5 d.p.i. | 6 d.p.i. | 7 d.p.i. | 8 d.p.i. | 9 d.p.i. | 10 d.p.i. | Total | Value |
|---------------------|----------|----------|----------|----------|----------|----------|----------|----------|----------|-----------|-------|-------|
| Normal (0)          | 10       | 8        | 4        | 3        | 1        | 0        | 3        | 7        | 7        | 7         | 50    | 0     |
| Mild symptoms (1)   | 0        | 2        | 6        | 6        | 8        | 9        | 6        | 2        | 2        | 2         | 43    | 43    |
| Severe symptoms (2) | 0        | 0        | 0        | 1        | 0        | 0        | 0        | 0        | 0        | 0         | 1     | 2     |
| Death (3)           | 0        | 0        | 0        | 0        | 1        | 1        | 1        | 1        | 1        | 1         | 6     | 18    |
| IVPI Value          |          |          |          |          |          |          |          |          |          |           |       | 0.63  |

**Table S2.2. Clinical data for the chicken intravenous pathogenicity test for O/YN/438/14.**

| Clinical symptoms   | 1 d.p.i. | 2 d.p.i. | 3 d.p.i. | 4 d.p.i. | 5 d.p.i. | 6 d.p.i. | 7 d.p.i. | 8 d.p.i. | 9 d.p.i. | 10 d.p.i. | Total | Value |
|---------------------|----------|----------|----------|----------|----------|----------|----------|----------|----------|-----------|-------|-------|
| Normal (0)          | 10       | 8        | 7        | 5        | 3        | 2        | 4        | 7        | 7        | 7         | 60    | 0     |
| Mild symptoms (1)   | 0        | 2        | 3        | 5        | 7        | 8        | 6        | 3        | 3        | 3         | 40    | 40    |
| Severe symptoms (2) | 0        | 0        | 0        | 0        | 0        | 0        | 0        | 0        | 0        | 0         | 0     | 0     |
| Death (3)           | 0        | 0        | 0        | 0        | 0        | 0        | 0        | 0        | 0        | 0         | 0     | 0     |
| IVPI Value          |          |          |          |          |          |          |          |          |          |           |       | 0.4   |

**Table S2.3. Clinical data for the chicken intravenous pathogenicity test for PBS.**

| Clinical symptoms   | 1 d.p.i. | 2 d.p.i. | 3 d.p.i. | 4 d.p.i. | 5 d.p.i. | 6 d.p.i. | 7 d.p.i. | 8 d.p.i. | 9 d.p.i. | 10 d.p.i. | Total | Value |
|---------------------|----------|----------|----------|----------|----------|----------|----------|----------|----------|-----------|-------|-------|
| Normal (0)          | 10       | 10       | 10       | 10       | 10       | 10       | 10       | 10       | 10       | 10        | 100   | 0     |
| Mild symptoms (1)   | 0        | 0        | 0        | 0        | 0        | 0        | 0        | 0        | 0        | 0         | 0     | 0     |
| Severe symptoms (2) | 0        | 0        | 0        | 0        | 0        | 0        | 0        | 0        | 0        | 0         | 0     | 0     |
| Death (3)           | 0        | 0        | 0        | 0        | 0        | 0        | 0        | 0        | 0        | 0         | 0     | 0     |
| IVPI Value          |          |          |          |          |          |          |          |          |          |           |       | 0     |

The tests were performed in accordance with the instructions in the World Organization for Animal Health (OIE) manual. Four-week-old SPF

Leghorn chickens (n=10 per group, Beijing Merial Vital Laboratory Animal Technology Co., Ltd, Beijing, China) were intravenously inoculated with 0.1 mL of a 1:10 dilution of allantoic fluid, and the control group was inoculated with PBS. The intravenous pathogenicity index (IVPI) for the virus in chickens was determined according to OIE recommendations.
